# Supplementary material for: Novel Functional Food Properties of Forest Onion (Eleutherine bulbosa Merr.) Phytochemicals for Treating Metabolic Syndrome: New Insights from a Combined Computational and In Vitro Approach
Source: MDPI journal article supplement (doi:10.3390/nu16101441), 2024-05-10

**Tabel S1.** Compounds and Peptides SMILE Canonical from FOE

| Compounds | Compounds                                                        | SMILES Canonical                                                  |
|-----------|------------------------------------------------------------------|-------------------------------------------------------------------|
| C1        | p-Cresol                                                         | <chem>CC1=CC=C(C=C1)O</chem>                                      |
| C2        | 4-Fluorophenol                                                   | <chem>C1=CC(=CC=C1O)F</chem>                                      |
| C3        | Guvacine                                                         | <chem>C1CNCC(=C1)C(=O)O</chem>                                    |
| C4        | Furaneol                                                         | <chem>CC1C(=O)C(=C(O1)C)O</chem>                                  |
| C5        | p-cymene                                                         | <chem>CC1=CC=C(C=C1)C(C)C</chem>                                  |
| C6        | Elaeokanine C                                                    | <chem>CCCC(=O)C1C2CCCN2CCC1O</chem>                               |
| C7        | Flavokawain A                                                    | <chem>COC1=CC=C(C=C1)C=CC(=O)C2=C(C=C(C=C2OC)OC)O</chem>          |
| C8        | 3-hydroxy-3,4-bis[(4-hydroxy-3-methoxyphenyl)methyl]oxolan-2-one | <chem>COC1=C(C=CC(=C1)CC2COC(=O)C2(CC3=CC(=C(C=C3)O)OC)O)O</chem> |
| C9        | Euparin                                                          | <chem>CC(=C)C1=CC2=CC(=C(C=C2O1)O)C(=O)C</chem>                   |
| C10       | Eleutherol                                                       | <chem>CC1C2=C(C=C3C=CC=C(C3=C2O)OC)C(=O)O1</chem>                 |

| Peptides No | Peptides | SMILES Canonical                                       |
|-------------|----------|--------------------------------------------------------|
| P1          | Gly-Leu  | <chem>CC(C)CC(C(=O)O)NC(=O)CN</chem>                   |
| P2          | Ala-Leu  | <chem>CC(C)CC(C(=O)O)NC(=O)C(C)N</chem>                |
| P3          | Val-Ser  | <chem>CC(C)C(C(=O)O)NC(CO)C(=O)O)N</chem>              |
| P4          | Gly-Phe  | <chem>C1=CC=C(C=C1)CC(C(=O)O)NC(=O)CN</chem>           |
| P5          | Ala-Phe  | <chem>CC(C(=O)O)NC(C1=CC=CC=C1)C(=O)O)N</chem>         |
| P6          | Asp-leu  | <chem>CC(C)CC(C(=O)O)NC(=O)C(CC(=O)O)N</chem>          |
| P7          | Val-Met  | <chem>CC(C)C(C(=O)O)NC(CCS)C(=O)O)N</chem>             |
| P8          | Ala-Tyr  | <chem>CC(C(=O)O)NC(C1=CC=C(C=C1)O)C(=O)O)N</chem>      |
| P9          | Lys-Leu  | <chem>CC(C)CC(C(=O)O)NC(=O)C(CCCCN)N</chem>            |
| P10         | Arg-Leu  | <chem>CC(C)CC(C(=O)O)NC(=O)C(CCCN=C(N)N)N</chem>       |
| P11         | Arg-Glu  | <chem>C(CC(C(=O)O)NC(CCC(=O)O)C(=O)O)N)CN=C(N)N</chem> |

**Table S2.** Full Visualization of Amino Acid Interaction of FOE Properties against MAPK8, PPARG, HMGCR, CPT-1, and GLP-1

| Compounds/Peptides and Control as Ligands | MAPK8 (3ELJ)                                                                      | PPARG (8BF1)                                                                        | HMGCR (2R4F)                                                                         | CPT-1 (1NDB)                                                                        | GLP-1 (4ZGM)                                                                        |
|-------------------------------------------|-----------------------------------------------------------------------------------|-------------------------------------------------------------------------------------|--------------------------------------------------------------------------------------|-------------------------------------------------------------------------------------|-------------------------------------------------------------------------------------|
| Control Metformin (4901)                  | 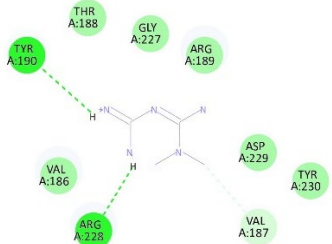 | 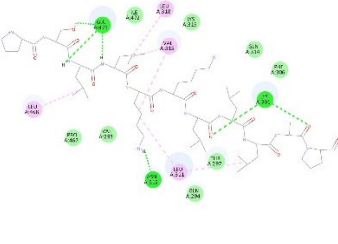  | 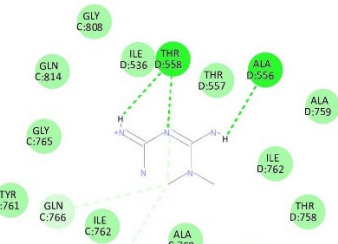  | 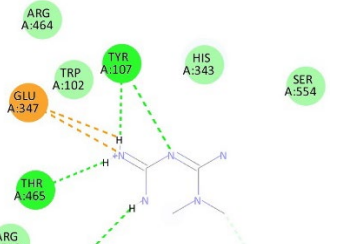 | 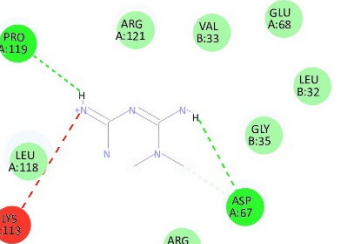 |
| Control Orlistat (3034010)                |                                                                                   | 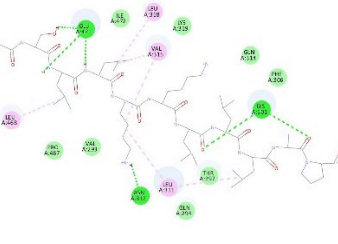 | 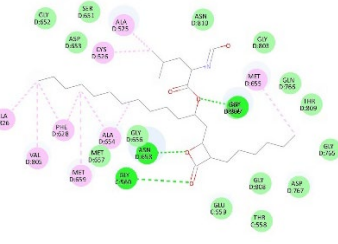 |                                                                                     |                                                                                     |

|                                   |                                                                                   |                                                                                    |                                                                                     |                                                                                     |                                                                                     |
|-----------------------------------|-----------------------------------------------------------------------------------|------------------------------------------------------------------------------------|-------------------------------------------------------------------------------------|-------------------------------------------------------------------------------------|-------------------------------------------------------------------------------------|
| Control<br>Simvastatin<br>(54454) |                                                                                   |                                                                                    | 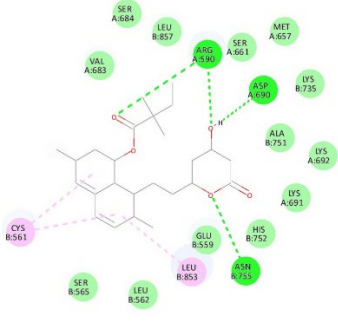 |                                                                                     |                                                                                     |
| C3 (3532)                         | 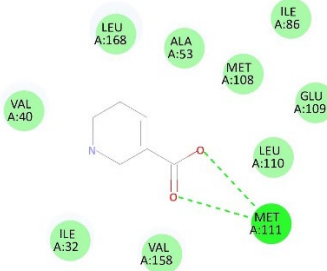 | 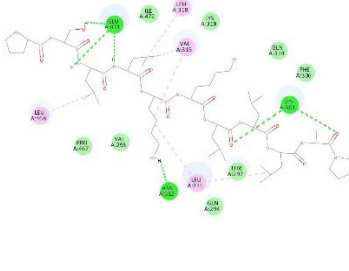 | 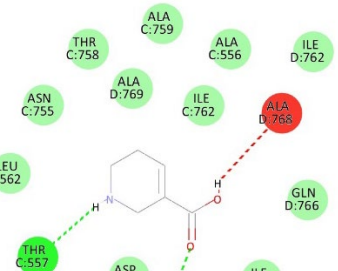 | 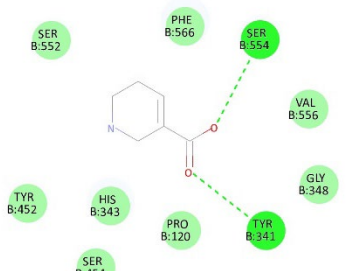 | 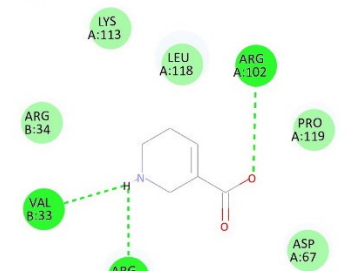 |

C6 (442855)

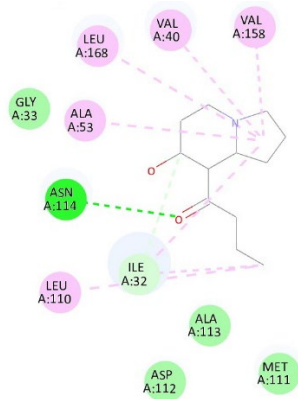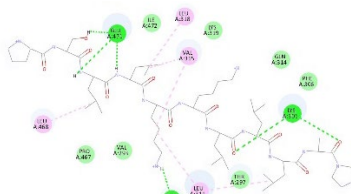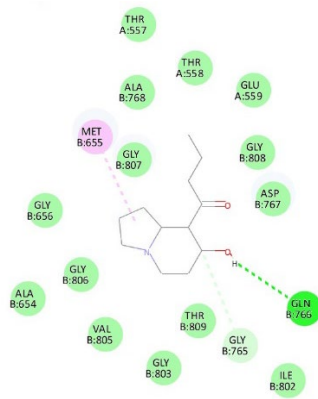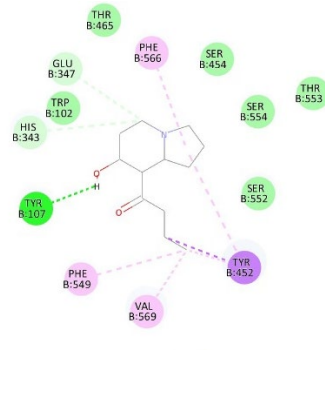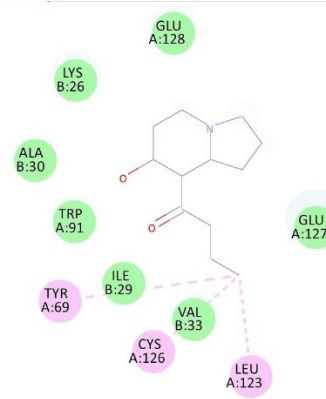

P1

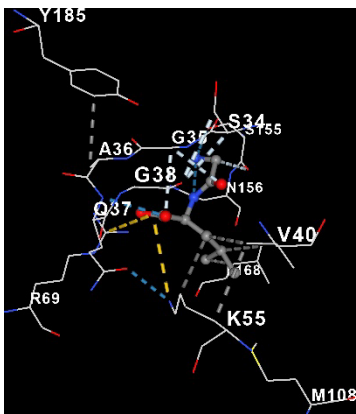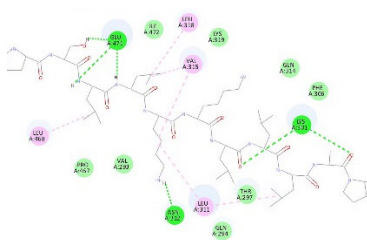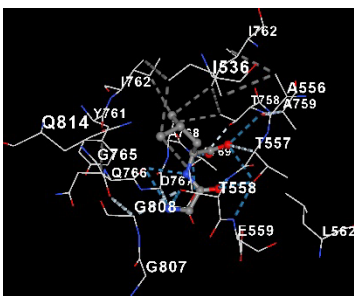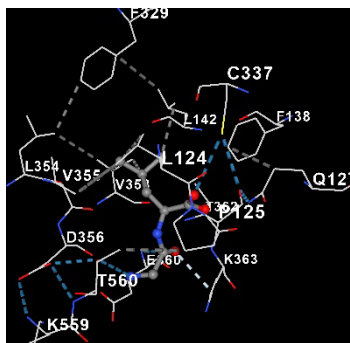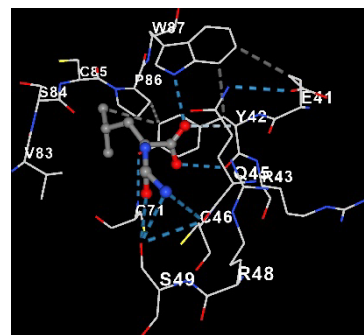

P2

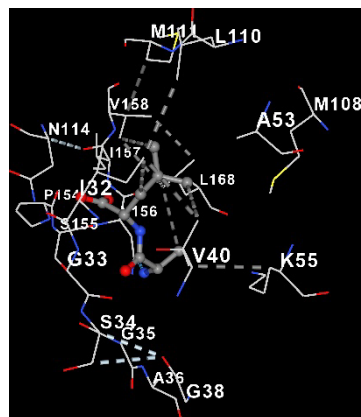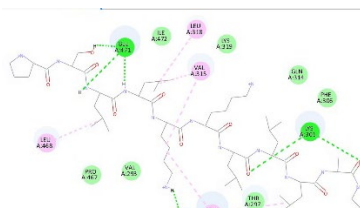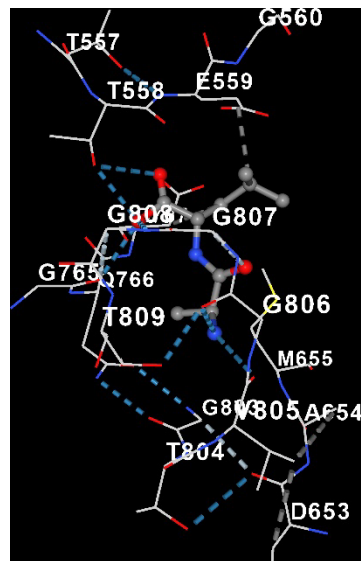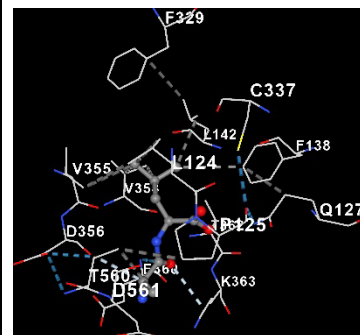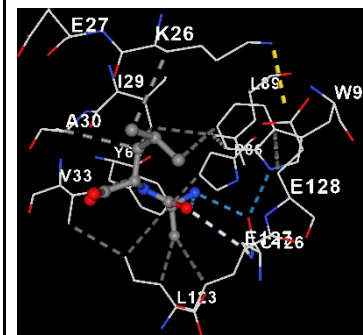

P3

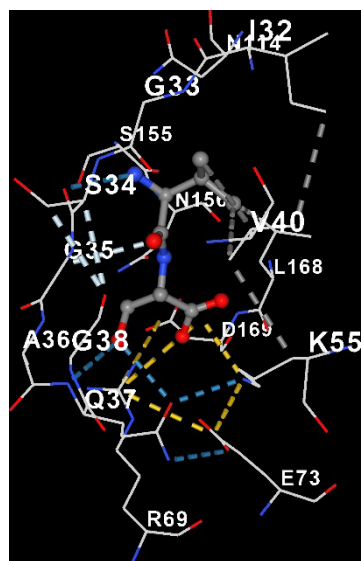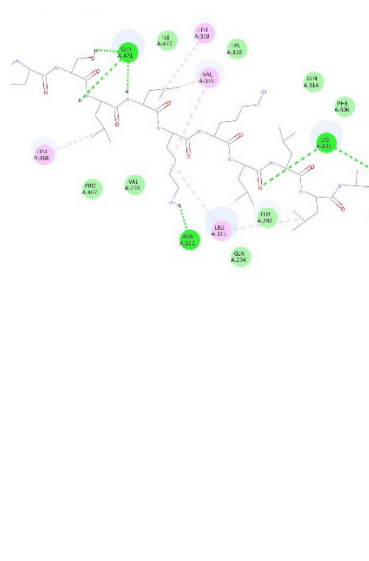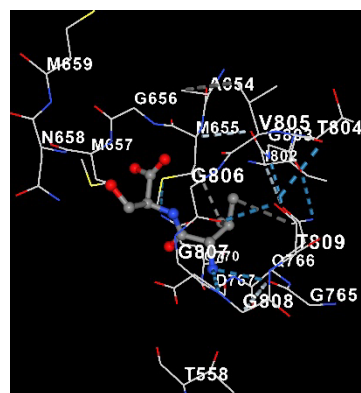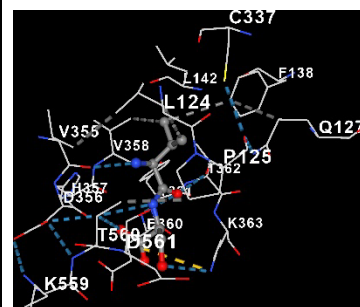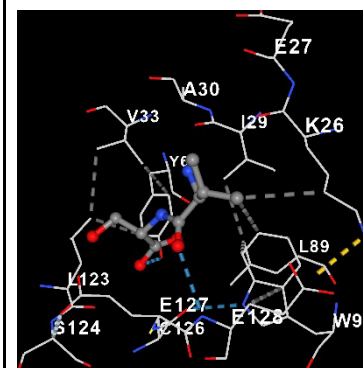

P4

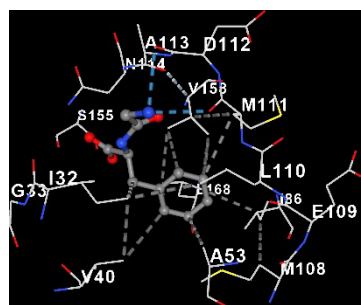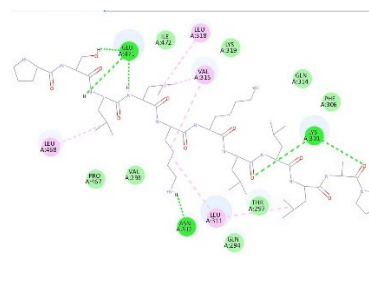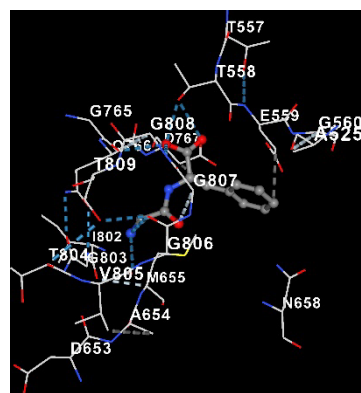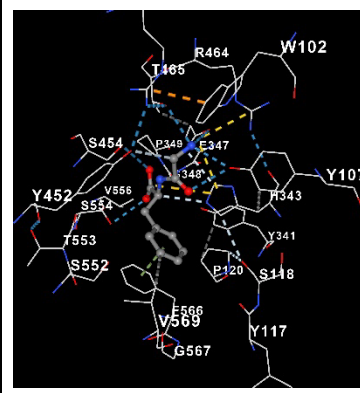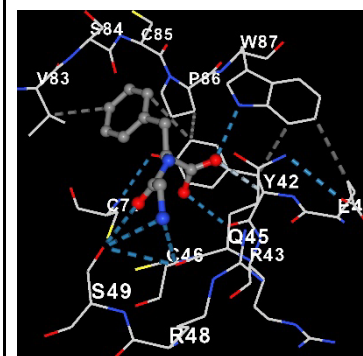

P5

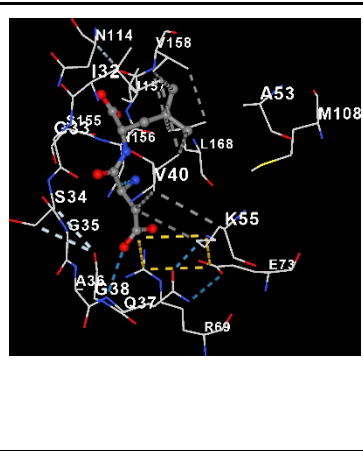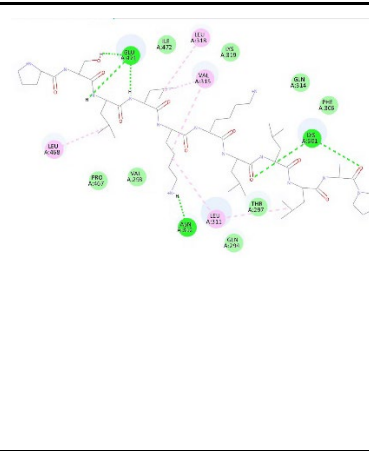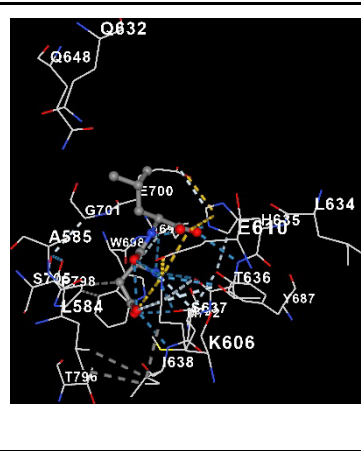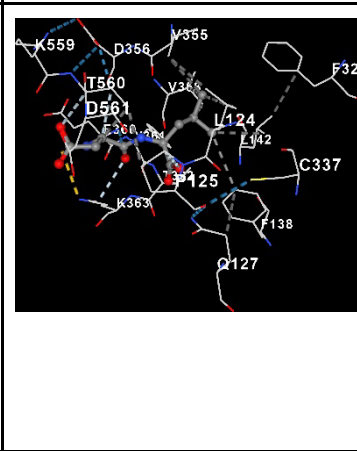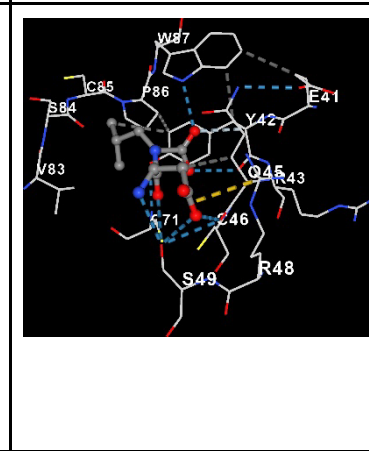

P8

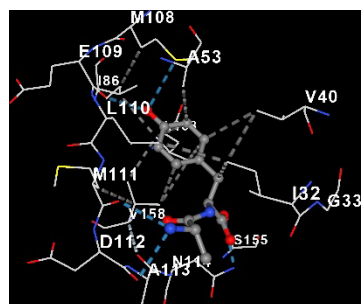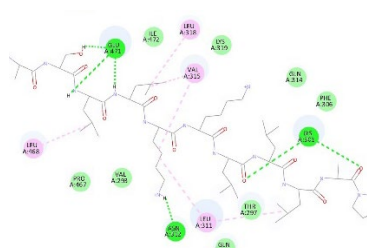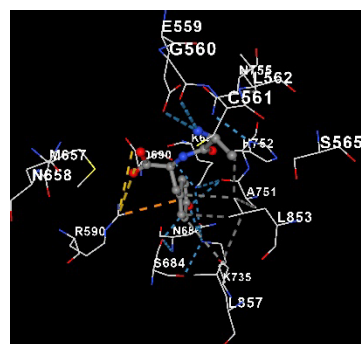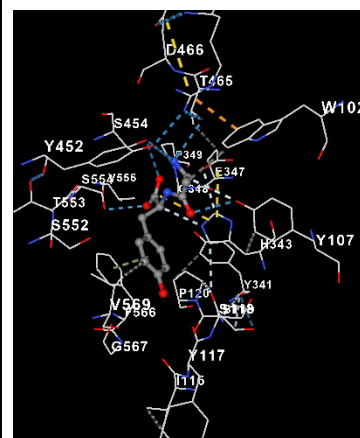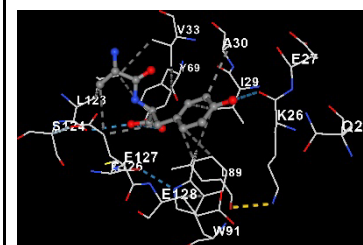

P9

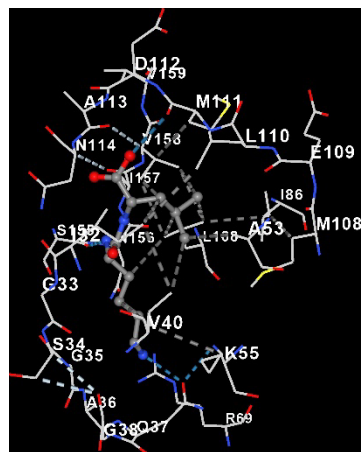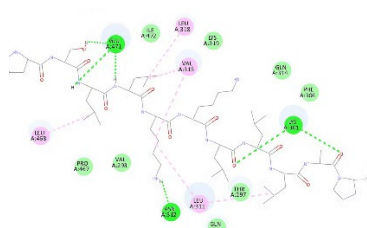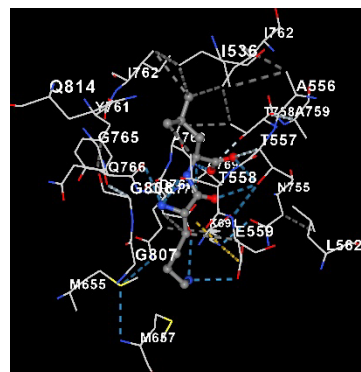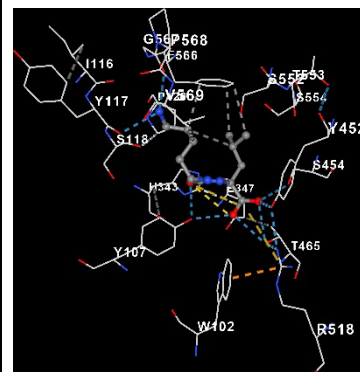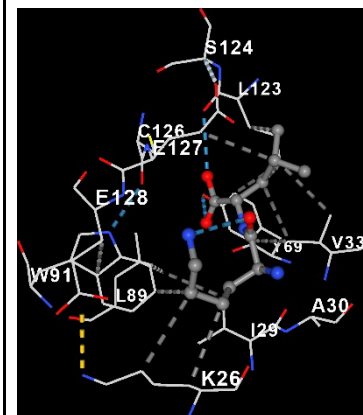

Supplement: s1 [file s1]
